# Supplementary material
Source: publisher figshare collection journal article supplement (https://acs.figshare.com/ndownloader/files/5841516)

## Supporting Information

### **Iridium Complex-Catalyzed Highly Selective Cross [2+2+2] Cycloaddition of Two Different Monoynes: 2:1 Coupling versus 1:2 Coupling**

Ryo Takeuchi\*<sup>†</sup> and Yoshihiko Nakaya

*Department of Chemistry, Graduate School of Integrated Science, Yokohama City University, 22-2, Seto, Kanazawa-ku, Yokohama 236-0027, Japan*

*<sup>†</sup>Present Address: Department of Chemistry, Aoyama Gakuin University, 5-10-1 Fuchinobe, Sagamihara, 229-8558, Japan*

**General Methods.**  $^1\text{H}$  NMR and  $^{13}\text{C}$  NMR spectra were measured on a Bruker AVANCE-400 spectrometer using  $\text{Me}_4\text{Si}$  as an internal standard. Samples were dissolved in  $\text{CDCl}_3$ . GC analyses were performed on a Shimadzu GC-14A using 3-mm x 2-m glass columns packed with 5% OV-17 on 60/80 mesh chromosorb w AW-DMCS. Capillary GC analyses were performed on a Shimadzu GC-17A Ver.2 using  $\text{SP}^{\text{TM}}\text{-2331}$  (0.32 mm i.d. x 60 m). Column chromatography was carried out on 70 - 230 mesh silica gel (Merk; Silica Gel 60). Medium-pressure column chromatography was carried out on a YFLC-540 using an ultrapack Si column. Elemental analyses were carried out on a Yanaco MT-5 CHN analyzer. HRMS measurements were performed on a JEOL SX102A spectrometer.

**Materials.** All reagents and the solvents were dried and purified before use by the usual procedures. Dimethyl acetylenedicarboxylate, methyl 2-octynoate, 1-hexyne, 1-decyne, phenylacetylene, 3-phenyl-1-propyne, 5-chloro-1-pentyne, 5-cyano-1-pentyne, 3-methoxy-1-propyne, trimethylsilylacetylene, *N,N*-dimethylpropargylamine, 3-hexyne, 5,7-dodecadiyne, 2-propyn-1-ol, 3-butyne-2-ol, 2-butyne-1-ol were purchased. 1,4-Dimethoxy-2-butyne was prepared by the reaction of disodio-2-butyne-1,4-diol with iodomethane.  $[\text{Ir}(\text{cod})\text{Cl}]_2$  was prepared according to the published method. Triphenylphosphine, 1,1'-bis(diphenylphosphino)ferrocene, bis(diphenylphosphino)methane, 1,2-bis(diphenylphosphino)ethane, 1,3-bis(diphenylphosphino)propane, 1,4-bis(diphenylphosphino)butane and 1,2-bis(dipentafluorophenylphosphino)ethane were purchased.

**Cross [2+2+2] cycloaddition of 1 with monoyne.** A typical procedure is described (Table 1, entry 2). To a toluene solution (5 mL) of  $[\text{Ir}(\text{cod})\text{Cl}]_2$  (13.4 mg, 0.02 mmol) and dppe (15.9 mg, 0.04 mmol) was added 1-hexyne (0.099 g, 1.2 mmol) via a syringe. Dimethyl acetylenedicarboxylate (0.284 g, 2 mmol) was then added to the solution by a syringe. The reaction mixture was stirred under reflux for 1 h. The progress of the reaction was monitored by GLC. After dimethyl

acetylenedicarboxylate was consumed, toluene was evaporated *in vacuo*. Column chromatography of the residue gave **3a** as a colorless oil (*n*-hexane/AcOEt=80/20, 0.359 g, yield 98%) and **4a** as a colorless oil (*n*-hexane/AcOEt=60/40, 0.003 g, yield 2%).

**Tetramethyl 5-(*n*-butyl)-1,2,3,4-benzenetetracarboxylate (3a):** <sup>1</sup>H NMR (400 MHz, CDCl<sub>3</sub>) δ 0.92 (t, *J* = 7.4 Hz, 3H), 1.36 (sxtet, *J* = 7.4 Hz, 2H), 1.59 (quintet, *J* = 7.4 Hz, 2H), 2.69-2.73 (m, 2H), 3.86 (s, 3H), 3.897 (s, 3H), 3.909 (s, 3H), 3.913 (s, 3H), 7.95 (s, 1H); <sup>13</sup>C NMR (100 MHz, CDCl<sub>3</sub>) δ 13.5 (CH<sub>3</sub>), 22.2 (CH<sub>2</sub>), 32.85 (CH<sub>2</sub>), 32.95 (CH<sub>2</sub>), 52.5 (OCH<sub>3</sub>), 52.7 (2C) (OCH<sub>3</sub>), 52.9(OCH<sub>3</sub>), 129.7 (arom), 129.9 (arom), 132.8 (arom), 133.6 (arom), 136.6 (arom), 142.7 (arom), 165.0 (C=O), 165.7 (C=O), 167.32 (C=O), 167.40 (C=O). This compound was reported in Reference 3(d) in the text. This compound was analyzed by GLC. *t*<sub>R</sub> = 23.64 min (OV-17; Holding at 140°C for 5 min, then elevating temperature 10°C/min to 280°C).

**Tetramethyl 5-(*n*-octyl)-1,2,3,4-benzenetetracarboxylate (3b):** <sup>1</sup>H NMR (400 MHz, CDCl<sub>3</sub>) δ 0.88 (t, *J* = 7.1 Hz, 3H), 1.23-1.30 (m, 10H), 1.58-1.62 (m, 2H), 2.68-2.72 (m, 2H), 3.86 (s, 3H), 3.89 (s, 3H), 3.908 (s, 3H), 3.912 (s, 3H), 7.95 (s, 1H); <sup>13</sup>C NMR (100 MHz, CDCl<sub>3</sub>) δ 13.9 (CH<sub>3</sub>), 22.5 (CH<sub>2</sub>), 29.0 (CH<sub>2</sub>), 29.1 (CH<sub>2</sub>), 29.2 (CH<sub>2</sub>), 30.9 (CH<sub>2</sub>), 31.6 (CH<sub>2</sub>), 33.2 (CH<sub>2</sub>), 52.5 (OCH<sub>3</sub>), 52.7 (2C) (OCH<sub>3</sub>), 52.9 (OCH<sub>3</sub>), 129.7 (arom), 129.9 (arom), 132.9 (arom), 133.6 (arom), 136.6 (arom), 142.8 (arom), 165.0 (C=O), 165.7 (C=O), 167.3 (C=O), 167.4 (C=O). Anal. Calcd for C<sub>22</sub>H<sub>30</sub>O<sub>8</sub>: C, 62.55; H, 7.16; O, 30.30. Found: C, 62.76; H, 7.27. This compound was analyzed by GLC. *t*<sub>R</sub> = 33.84 min (OV-17; Holding at 140°C for 5 min, then elevating temperature 10°C/min to 280°C).

**Tetramethyl 5-phenyl-1,2,3,4-benzenetetracarboxylate (3c):** <sup>1</sup>H NMR (400 MHz, CDCl<sub>3</sub>) δ 3.61 (s, 3H), 3.88 (s, 3H), 3.91 (s, 3H), 3.95 (s, 3H), 7.32-7.34 (m, 2H), 7.40-7.43 (m, 3H), 8.09 (s, 1H); <sup>13</sup>C NMR (100 MHz, CDCl<sub>3</sub>) δ 52.5 (OCH<sub>3</sub>), 52.90(OCH<sub>3</sub>), 52.92 (OCH<sub>3</sub>), 53.1 (OCH<sub>3</sub>), 128.1 (2C) (arom), 128.5 (3C) (arom), 130.0 (arom), 130.1 (arom), 133.85 (arom), 133.97 (arom), 136.6 (arom), 137.9 (arom),

142.1 (arom), 164.8 (C=O), 165.6 (C=O), 167.3 (2C) (C=O). This compound was reported in Reference 3(d) in the text. This compound was analyzed by GLC.  $t_R$  = 32.04 min (OV-17; Holding at 140°C for 5 min, then elevating temperature 10°C/min to 280°C).

**Tetramethyl 5-phenylmethyl-1,2,3,4-benzenetetracarboxylate (3d):**  $^1\text{H}$  NMR (400 MHz,  $\text{CDCl}_3$ )  $\delta$  3.75 (s, 3H), 3.84 (s, 3H), 3.86 (s, 3H), 3.90 (s, 3H), 4.11 (s, 2H), 7.10-7.12 (m, 2H), 7.19-7.21 (m, 1H), 7.22-7.29 (m, 2H), 7.90 (s, 1H);  $^{13}\text{C}$  NMR (100 MHz,  $\text{CDCl}_3$ )  $\delta$  38.7 ( $\text{CH}_2$ ), 52.6 ( $\text{OCH}_3$ ), 52.8 (2C) ( $\text{OCH}_3$ ), 53.0 ( $\text{OCH}_3$ ), 126.7 (arom), 128.6 (2C) (arom), 128.9 (2C) (arom), 130.1 (arom), 130.2 (arom), 133.4 (arom), 134.5 (arom), 136.9 (arom), 138.3 (arom), 141.0 (arom), 164.9 (C=O), 165.7 (C=O), 167.2 (C=O), 167.4 (C=O). Anal. Calcd for  $\text{C}_{21}\text{H}_{20}\text{O}_8$ : C, 63.00; H, 5.03; O, 31.97. Found: C, 63.15; H, 5.17. This compound was analyzed by GLC.  $t_R$  = 38.03 min (OV-17; Holding at 140°C for 5 min, then elevating temperature 10°C/min to 280°C).

**Tetramethyl 5-(3-chloropropyl)-1,2,3,4-benzenetetracarboxylate (3e):**  $^1\text{H}$  NMR (400 MHz,  $\text{CDCl}_3$ )  $\delta$  2.07-2.12 (m, 2H), 2.87-2.91 (m, 2H), 3.54 (t,  $J$  = 6.2 Hz, 2H), 3.87 (s, 3H), 3.91 (s, 3H), 3.92 (s, 6H), 7.98 (s, 1H);  $^{13}\text{C}$  NMR (100 MHz,  $\text{CDCl}_3$ )  $\delta$  30.6 ( $\text{CH}_2$ ), 33.6 ( $\text{CH}_2$ ), 43.9 ( $\text{CH}_2$ ), 52.84 ( $\text{OCH}_3$ ), 52.90 ( $\text{OCH}_3$ ), 52.94 ( $\text{OCH}_3$ ), 53.10 ( $\text{OCH}_3$ ), 130.1 (arom), 130.2 (arom), 133.5 (arom), 134.0 (arom), 136.9 (arom), 141.0 (arom), 164.9 (C=O), 165.6 (C=O), 167.3 (C=O), 167.4 (C=O). Anal. Calcd for  $\text{C}_{17}\text{H}_{19}\text{ClO}_8$ : C, 52.79; H, 4.95; Cl, 9.17; O, 33.09. Found: C, 52.57; H, 4.92; Cl, 9.09. This compound was analyzed by GLC.  $t_R$  = 30.12 min (OV-17; Holding at 140°C for 5 min, then elevating temperature 10°C/min to 280°C).

**Tetramethyl 5-(3-cyanopropyl)-1,2,3,4-benzenetetracarboxylate (3f):**  $^1\text{H}$  NMR (400 MHz,  $\text{CDCl}_3$ )  $\delta$  1.99 (quintet,  $J$  = 7.6 Hz, 2H), 2.40 (t,  $J$  = 7.6 Hz, 2H), 2.84-2.88 (m, 2H), 3.87 (s, 3H), 3.92 (s, 9H), 7.97 (s, 1H);  $^{13}\text{C}$  NMR (100 MHz,  $\text{CDCl}_3$ )  $\delta$  16.6 ( $\text{CH}_2$ ), 26.6 ( $\text{CH}_2$ ), 32.0 ( $\text{CH}_2$ ), 52.82 ( $\text{OCH}_3$ ), 52.86 ( $\text{OCH}_3$ ), 52.89 ( $\text{OCH}_3$ ),

53.0(OCH<sub>3</sub>), 118.8 (CN), 130.2 (arom), 130.3 (arom), 133.6 (2C) (arom), 136.7 (arom), 140.0 (arom), 164.6 (C=O), 165.5 (C=O), 167.0 (C=O), 167.1 (C=O). Anal. Calcd for C<sub>18</sub>H<sub>19</sub>NO<sub>8</sub>: C, 57.29; H, 5.08; N, 3.71; O, 33.92. Found: C, 57.13; H, 5.08; N, 3.70. This compound was analyzed by GLC. *t<sub>R</sub>* = 37.36 min (OV-17; Holding at 140°C for 5 min, then elevating temperature 10°C/min to 280°C).

**Tetramethyl 5-(methoxymethyl)-1,2,3,4-benzenetetracarboxylate (3g):** <sup>1</sup>H NMR (400 MHz, CDCl<sub>3</sub>) δ 3.39 (s, 3H), 3.87 (s, 3H), 3.90 (s, 3H), 3.93 (s, 6H), 4.58 (s, 2H), 8.19 (s, 1H); <sup>13</sup>C NMR (100 MHz, CDCl<sub>3</sub>) δ 52.7 (OCH<sub>3</sub>), 52.84 (OCH<sub>3</sub>), 52.86 (OCH<sub>3</sub>), 53.0 (OCH<sub>3</sub>), 58.5 (OCH<sub>3</sub>), 70.9 (CH<sub>2</sub>O), 130.2 (arom), 130.3 (arom), 131.6 (arom), 134.2 (arom), 135.0 (arom), 139.0 (arom), 164.9 (C=O), 165.6 (C=O), 166.7 (C=O), 167.3 (C=O). This compound was reported in Reference 3(d) in the text. This compound was analyzed by GLC. *t<sub>R</sub>* = 22.92 min (OV-17; Holding at 140°C for 5 min, then elevating temperature 10°C/min to 280°C).

**Tetramethyl 5-trimethylsilyl-1,2,3,4-benzenetetracarboxylate (3h):** <sup>1</sup>H NMR (400 MHz, CDCl<sub>3</sub>) δ 0.34 (s, 9H), 3.87 (s, 3H), 3.88 (s, 3H), 3.92 (s, 3H), 3.93 (s, 3H), 8.24 (s, 1H); <sup>13</sup>C NMR (100 MHz, CDCl<sub>3</sub>) δ -0.8 (3C) (CH<sub>3</sub>), 52.6 (OCH<sub>3</sub>), 52.8 (2C) (OCH<sub>3</sub>), 52.9 (OCH<sub>3</sub>), 129.3 (arom), 130.2 (arom), 134.9 (arom), 138.0 (arom), 141.4 (arom), 142.3 (arom), 165.4 (C=O), 166.4 (C=O), 167.3 (C=O), 168.4 (C=O). Anal. Calcd for C<sub>17</sub>H<sub>22</sub>O<sub>8</sub>Si: C, 53.39; H, 5.80; O, 33.47; Si, 7.34. Found: C, 53.35; H, 5.84. This compound was analyzed by GLC. *t<sub>R</sub>* = 21.28 min (OV-17; Holding at 140°C for 5 min, then elevating temperature 10°C/min to 280°C).

**Tetramethyl 5-(*N,N*-dimethylaminomethyl)-1,2,3,4-benzenetetracarboxylate (3i):** <sup>1</sup>H NMR (400 MHz, CDCl<sub>3</sub>) δ 2.18 (s, 6H), 3.53 (s, 2H), 3.86 (s, 6H), 3.91 (s, 6H), 8.06 (s, 1H); <sup>13</sup>C NMR (100 MHz, CDCl<sub>3</sub>) δ 44.9 (2C) (CH<sub>3</sub>), 52.3 (OCH<sub>3</sub>), 52.69 (OCH<sub>3</sub>), 52.72 (OCH<sub>3</sub>), 52.9 (OCH<sub>3</sub>), 60.8 (CH<sub>2</sub>N), 129.7 (arom), 130.3 (arom), 133.0 (arom), 133.8 (arom), 136.8 (arom), 140.3 (arom), 165.0 (C=O), 165.7 (C=O), 167.1 (C=O), 167.3 (C=O). Anal. Calcd for C<sub>17</sub>H<sub>21</sub>NO<sub>8</sub>: C, 55.58; H, 5.76; N, 3.81; O,

34.84. Found: C, 55.57; H, 5.77; N, 3.65. This compound was analyzed by GLC.  $t_R$  = 21.76 min (OV-17; Holding at 140°C for 5 min, then elevating temperature 10°C/min to 280°C).

**Tetramethyl**

**5-((*N*-methoxycarbonyl)aminomethyl)-1,2,3,4-benzenetetracarboxylate (3j):**  $^1\text{H}$  NMR (400 MHz,  $\text{CDCl}_3$ )  $\delta$  3.67 (s, 3H), 3.86 (s, 3H), 3.90 (s, 3H), 3.91 (s, 6H), 4.40 (d,  $J$  = 7.1 Hz, 2H), 5.50 (br, 1H), 8.14 (s, 1H);  $^{13}\text{C}$  NMR (100 MHz,  $\text{CDCl}_3$ )  $\delta$  42.8 ( $\text{CH}_2$ ), 52.3 ( $\text{OCH}_3$ ), 52.96 (2C) ( $\text{OCH}_3$ ), 53.06 ( $\text{OCH}_3$ ), 53.12 ( $\text{OCH}_3$ ), 130.9 (arom), 131.1 (arom), 133.4 (arom), 134.2 (arom), 135.3 (arom), 139.3 (arom), 156.8 (C=O), 164.7 (C=O), 165.7 (C=O), 167.1 (2C) (C=O);  $R_f$  = 0.20 (*n*-hexane : AcOEt = 1:6). Anal. Calcd for  $\text{C}_{17}\text{H}_{19}\text{NO}_{10}$ : C, 51.39; H, 4.82; N, 3.53; O, 40.27. Found: C, 51.31; H, 4.89; N, 3.54.

**Tetramethyl 5,6-bis(methoxymethyl)-1,2,3,4-benzenetetracarboxylate (3k):**  $^1\text{H}$  NMR (400 MHz,  $\text{CDCl}_3$ )  $\delta$  3.27 (s, 3H x 2), 3.85 (s, 3H x 2), 3.88 (s, 3H x 2), 4.61 (s, 2H x 2);  $^{13}\text{C}$  NMR (100 MHz,  $\text{CDCl}_3$ )  $\delta$  52.8 (2C) ( $\text{OCH}_3$ ), 53.0 (2C) ( $\text{OCH}_3$ ), 58.2 (2C) ( $\text{OCH}_3$ ), 68.2 (2C) ( $\text{OCH}_2$ ), 130.9 (2C) (arom), 135.1 (2C) (arom), 138.7 (2C) (arom), 166.2 (2C) (C=O), 167.3 (2C) (C=O). HRMS (FAB) Calcd for  $\text{C}_{18}\text{H}_{23}\text{O}_{10}$  ( $[\text{M}+\text{H}]^+$ )  $m/z$  399.1291. Found 399.1286. This compound was reported in Reference 3(d) in the text. This compound was analyzed by GLC.  $t_R$  = 26.28 min (OV-17; Holding at 140°C for 5 min, then elevating temperature 10°C/min to 280°C).

**Tetramethyl 5,6-bis(acetoxymethyl)-1,2,3,4-benzenetetracarboxylate (3l):**  $^1\text{H}$  NMR (400 MHz,  $\text{CDCl}_3$ )  $\delta$  2.01 (s, 3H x 2), 3.86 (s, 3H x 2), 3.91 (s, 3H x 2), 5.38 (s, 2H x 2);  $^{13}\text{C}$  NMR (100 MHz,  $\text{CDCl}_3$ )  $\delta$  20.4 (2C) ( $\text{CH}_3$ ), 53.0 (2C) ( $\text{OCH}_3$ ), 53.1 (2C) ( $\text{OCH}_3$ ), 59.5 (2C) ( $\text{CH}_2\text{O}$ ), 131.9 (2C) (arom), 135.5 (2C) (arom), 136.8 (2C) (arom), 165.9 (2C) (C=O), 166.6 (2C) (C=O), 169.9 (2C) (C=O). Anal. Calcd for  $\text{C}_{20}\text{H}_{22}\text{O}_{12}$ : C, 52.87; H, 4.88; O, 42.25. Found: C, 52.71; H, 4.97. This compound was analyzed by GLC.  $t_R$  = 36.62 min (OV-17; Holding at 140°C for 5 min, then

elevating temperature 10°C/min to 280°C).

**Tetramethyl 5,6-diethyl-1,2,3,4-benzenetetracarboxylate (3m):** <sup>1</sup>H NMR (400 MHz, CDCl<sub>3</sub>) δ 1.20 (t, *J* = 7.4 Hz, 3H x 2), 2.74 (q, *J* = 7.4 Hz, 2H x 2), 3.84 (s, 3H x 2), 3.89 (s, 3H x 2); <sup>13</sup>C NMR (100 MHz, CDCl<sub>3</sub>) δ 15.3 (2C) (CH<sub>3</sub>), 23.5 (2C) (CH<sub>2</sub>), 52.6 (2C) (OCH<sub>3</sub>), 52.8 (2C) (OCH<sub>3</sub>), 129.0 (2C) (arom), 134.9 (2C) (arom), 143.4 (2C) (arom), 166.6 (2C) (C=O), 167.9 (2C) (C=O). HRMS (FAB) Calcd for C<sub>18</sub>H<sub>23</sub>O<sub>8</sub> ([M+H]<sup>+</sup>) *m/z* 367.1393. Found 367.1391. This compound was reported in Reference 3(d) in the text. This compound was analyzed by GLC. *t<sub>R</sub>* = 22.26 min (OV-17; Holding at 140°C for 5 min, then elevating temperature 10°C/min to 280°C).

**Tetramethyl 5-(*n*-butyl)-6-(1-hexynyl)-1,2,3,4-benzenetetracarboxylate (3n):** <sup>1</sup>H NMR (400 MHz, CDCl<sub>3</sub>) δ 0.93 (t, *J* = 7.2 Hz, 3H), 0.95 (t, *J* = 7.2 Hz, 3H), 1.39 (quintet, *J* = 7.3 Hz, 2H), 1.48 (quintet, *J* = 7.3 Hz, 2H), 1.57-1.61 (m, 4H), 2.48 (t, *J* = 7.0 Hz, 2H), 2.82-2.86 (m, 2H), 3.84 (s, 6H), 3.88 (s, 3H), 3.90 (s, 3H); <sup>13</sup>C NMR (100 MHz, CDCl<sub>3</sub>) δ 13.4 (CH<sub>3</sub>), 13.6 (CH<sub>3</sub>), 19.3 (CH<sub>2</sub>), 21.8 (CH<sub>2</sub>), 22.9 (CH<sub>2</sub>), 30.3 (CH<sub>2</sub>), 32.1 (CH<sub>2</sub>), 32.3 (CH<sub>2</sub>), 52.59 (OCH<sub>3</sub>), 52.63 (OCH<sub>3</sub>), 52.9 (2C) (OCH<sub>3</sub>), 75.2 (C≡C), 102.1 (C≡C), 125.3 (arom), 128.1 (arom), 129.7 (arom), 134.1 (arom), 137.7 (arom), 146.3 (arom), 165.8 (C=O), 166.3 (C=O), 166.9 (C=O), 167.1 (C=O). Anal. Calcd for C<sub>24</sub>H<sub>30</sub>O<sub>8</sub>: C, 64.56; H, 6.77; O, 28.67. Found: C, 64.26; H, 6.78. This compound was analyzed by GLC. *t<sub>R</sub>* = 38.95 min (OV-17; Holding at 140°C for 5 min, then elevating temperature 10°C/min to 280°C).

**Tetramethyl 5-methyl-6-phenyl-1,2,3,4-benzenetetracarboxylate (3o):** <sup>1</sup>H NMR (400 MHz, CDCl<sub>3</sub>) δ 2.12 (s, 3H), 3.45 (s, 3H), 3.84 (s, 3H), 3.88 (s, 3H), 3.90 (s, 3H), 7.13-7.16 (m, 2H), 7.37-7.42 (m, 3H); <sup>13</sup>C NMR (100 MHz, CDCl<sub>3</sub>) δ 17.8 (CH<sub>3</sub>), 52.16 (OCH<sub>3</sub>), 52.7 (OCH<sub>3</sub>), 52.91 (OCH<sub>3</sub>), 52.95 (OCH<sub>3</sub>), 128.11 (arom), 128.17 (arom), 128.22 (2C) (arom), 128.7 (2C) (arom), 130.1 (arom), 134.9 (arom), 135.3 (arom), 136.8 (arom), 138.0 (arom), 143.2 (arom), 166.2 (C=O), 166.5 (C=O), 167.1 (C=O), 167.7 (C=O). Anal. Calcd for C<sub>21</sub>H<sub>20</sub>O<sub>8</sub>: C, 63.00; H, 5.03; O, 31.97. Found:

C, 62.82; H, 5.15. This compound was analyzed by GLC.  $t_R$  = 35.90 min (OV-17; Holding at 140°C for 5 min, then elevating temperature 10°C/min to 280°C).

**Trimethyl 1,3-dihydro-3-oxo-4,5,6-isobenzofurantricarboxylate (6a):**  $^1\text{H}$  NMR (400 MHz,  $\text{CDCl}_3$ )  $\delta$  3.90 (s, 3H), 3.93 (s, 3H), 3.99 (s, 3H), 5.38 (s, 2H), 7.98 (s, 1H);  $^{13}\text{C}$  NMR (100 MHz,  $\text{CDCl}_3$ )  $\delta$  53.18 ( $\text{OCH}_3$ ), 53.22 ( $\text{OCH}_3$ ), 53.26 ( $\text{OCH}_3$ ), 69.1 ( $\text{OCH}_2$ ), 124.9 (arom), 125.5 (arom), 131.8 (arom), 132.6 (arom), 135.6 (arom), 148.5 (arom), 164.5 ( $\text{C}=\text{O}$ ), 165.2 ( $\text{C}=\text{O}$ ), 165.8 ( $\text{C}=\text{O}$ ), 166.8 ( $\text{C}=\text{O}$ ). HRMS (FAB) Calcd for  $\text{C}_{14}\text{H}_{13}\text{O}_8$  ( $[\text{M}+\text{H}]^+$ )  $m/z$  309.0610. Found 309.0602. This compound was reported in Reference 3(d) in the text. This compound was analyzed by GLC.  $t_R$  = 27.76 min (OV-17; Holding at 140°C for 5 min, then elevating temperature 10°C/min to 280°C).

**Trimethyl 1-hydro-1-methyl-3-oxo-4,5,6-isobenzofurantricarboxylate (6b):**  $^1\text{H}$  NMR (400 MHz,  $\text{CDCl}_3$ )  $\delta$  1.68 (d,  $J$  = 6.7 Hz, 3H), 3.91 (s, 3H), 3.95 (s, 3H), 4.00 (s, 3H), 5.62 (q,  $J$  = 6.7 Hz, 1H), 7.96 (s, 1H);  $^{13}\text{C}$  NMR (100 MHz,  $\text{CDCl}_3$ )  $\delta$  19.9 ( $\text{CH}_3$ ), 53.22 ( $\text{OCH}_3$ ), 53.26 ( $\text{OCH}_3$ ), 53.32 ( $\text{OCH}_3$ ), 77.2 ( $\text{OCH}$ ), 124.2 (arom), 125.6 (arom), 132.1 (arom), 132.8 (arom), 136.0 (arom), 152.9 (arom), 164.6 ( $\text{C}=\text{O}$ ), 165.3 ( $\text{C}=\text{O}$ ), 165.8 ( $\text{C}=\text{O}$ ), 166.1 ( $\text{C}=\text{O}$ ). Anal. Calcd for  $\text{C}_{15}\text{H}_{14}\text{O}_8$ : C, 55.90; H, 4.38; O, 39.72. Found: C, 55.99; H, 4.41. This compound was analyzed by GLC.  $t_R$  = 24.65 min (OV-17; Holding at 140°C for 5 min, then elevating temperature 10°C/min to 280°C).

**Trimethyl 1,3-dihydro-3-oxo-7-methyl-4,5,6-isobenzofurantricarboxylate (6c):**  $^1\text{H}$  NMR (400 MHz,  $\text{CDCl}_3$ )  $\delta$  2.34 (s, 3H), 3.89 (s, 3H), 3.94 (s, 3H), 4.00 (s, 3H), 5.30 (s, 2H);  $^{13}\text{C}$  NMR (100 MHz,  $\text{CDCl}_3$ )  $\delta$  15.1 ( $\text{CH}_3$ ), 53.0 ( $\text{OCH}_3$ ), 53.19 ( $\text{OCH}_3$ ), 53.25 ( $\text{OCH}_3$ ), 68.7 ( $\text{OCH}_2$ ), 123.5 (arom), 128.8 (arom), 131.3 (arom), 132.3 (arom), 139.3 (arom), 149.4 (arom), 164.7 ( $\text{C}=\text{O}$ ), 165.2 ( $\text{C}=\text{O}$ ), 167.0 ( $\text{C}=\text{O}$ ), 167.4 ( $\text{C}=\text{O}$ ). Anal. Calcd for  $\text{C}_{15}\text{H}_{14}\text{O}_8$ : C, 55.90; H, 4.38; O, 39.72. Found: C, 56.09; H, 4.39. This compound was analyzed by GLC.  $t_R$  = 29.71 min (OV-17; Holding at 140°C for 5 min, then elevating temperature 10°C/min to 280°C).



**Cross [2+2+2] cycloaddition of 7 with 2k.** To a THF solution (5 mL) of  $[\text{Ir}(\text{cod})\text{Cl}]_2$  (13.4 mg, 0.02 mmol) and dppe (15.9 mg, 0.04 mmol) was added **2k** (0.137 g, 1.2 mmol) via a syringe. Ester **7** (0.308 g, 2 mmol) was then added to the solution using a syringe. The reaction mixture was stirred for 1 h at 50°C. The progress of the reaction was monitored by GLC. After **7** was consumed, THF was evaporated *in vacuo*. Column chromatography of the residue gave a mixture of two trimers of **7** as a colorless oil (*n*-hexane/AcOEt=98/2, 34 mg, yield 11%) and a mixture of **8** and **9** as a colorless oil (*n*-hexane/AcOEt=90/10, 0.347 g, yield 82%). The ratio of **8** to **9** was determined using capillary GC. Separation **8** and **9** was carried out using medium-pressure column chromatography. Eluent for **8** was *n*-hexane/AcOEt=90/10. Eluent for **9** was *n*-hexane/AcOEt=80/20.

**Dimethyl 4,5-bis(methoxymethyl)-2,6-di(*n*-pentyl)-1,3-benzenedicarboxylate (8):**  $^1\text{H}$  NMR (400 MHz,  $\text{CDCl}_3$ )  $\delta$  0.88 (t,  $J = 7.0$  Hz, 3H), 0.91 (t,  $J = 6.9$  Hz, 3H), 1.27-1.29 (m, 4H), 1.32-1.38 (m, 4H), 1.48-1.65 (m, 4H), 2.44-2.49 (m, 2H), 2.57-2.60 (m, 2H), 3.31 (s, 3H), 3.39 (s, 3H), 3.88 (s, 6H), 4.47 (s, 2H), 4.52 (s, 2H);  $^{13}\text{C}$  NMR (100 MHz,  $\text{CDCl}_3$ )  $\delta$  13.75 ( $\text{CH}_3$ ), 13.80 ( $\text{CH}_3$ ), 22.0 ( $\text{CH}_2$ ), 22.1 ( $\text{CH}_2$ ), 30.8 ( $\text{CH}_2$ ), 31.3 (2C) ( $\text{CH}_2$ ), 31.8 ( $\text{CH}_2$ ), 32.16 ( $\text{CH}_2$ ), 32.22 ( $\text{CH}_2$ ), 51.7 (2C) ( $\text{OCH}_3$ ), 56.1 (2C) ( $\text{OCH}_3$ ), 67.2 ( $\text{OCH}_2$ ), 69.3 ( $\text{OCH}_2$ ), 132.82 (arom), 132.89 (arom), 135.1 (arom), 136.5 (arom), 136.6 (arom), 140.4 (arom), 169.7 ( $\text{C}=\text{O}$ ), 170.0 ( $\text{C}=\text{O}$ ). Anal. Calcd for  $\text{C}_{24}\text{H}_{38}\text{O}_6$ : C, 68.22; H, 9.06; O, 22.72. Found: C, 68.45; H, 9.01. HRMS (GC-EI) Calcd for  $\text{C}_{24}\text{H}_{38}\text{O}_6$  ( $[\text{M}]^+$ )  $m/z$  422.2668. Found 422.2673. This compound was analyzed by capillary GLC.  $t_R = 13.89$  min ( $\text{SP}^{\text{TM}}$ -2331; Holding at 250°C).

**Dimethyl 2,3-bis(methoxymethyl)-5,6-di(*n*-pentyl)-1,4-benzenedicarboxylate (9):**  $^1\text{H}$  NMR (400 MHz,  $\text{CDCl}_3$ )  $\delta$  0.90 (t,  $J = 7.0$  Hz, 3H x 2), 1.26-1.40 (m, 4H x 2), 1.47-1.53 (m, 2H x 2), 2.51-2.55 (m, 2H x 2), 3.28 (s, 3H x 2), 3.89 (s, 3H x 2), 4.45 (s, 2H x 2);  $^{13}\text{C}$  NMR (100 MHz,  $\text{CDCl}_3$ )  $\delta$  13.9 (2C) ( $\text{CH}_3$ ), 22.2 (2C) ( $\text{CH}_2$ ), 30.6 (2C) ( $\text{CH}_2$ ), 31.0 (2C) ( $\text{CH}_2$ ), 32.4 (2C) ( $\text{CH}_2$ ), 51.9 (2C) ( $\text{OCH}_3$ ), 58.1 (2C) ( $\text{OCH}_3$ ), 69.1

(2C) (OCH<sub>2</sub>), 131.9 (2C) (arom), 136.2 (2C) (arom), 138.1 (2C) (arom), 170.2 (2C) (C=O). Anal. Calcd for C<sub>24</sub>H<sub>38</sub>O<sub>6</sub>: C, 68.22; H, 9.06; O, 22.72. Found: C, 68.09; H, 8.86. This compound was analyzed by capillary GLC. *t<sub>R</sub>* = 13.12 min (SP<sup>TM</sup>-2331; Holding at 250°C).

### Assignment of **8**

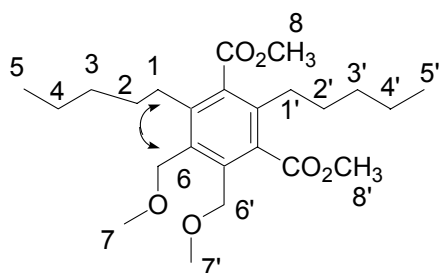

The 2D NOESY spectrum reveals a cross-peak of methylene proton H-1 with methylene proton H-6. This suggests a short distance between H-1 and H-6. The reaction of **7** with **2k** can give three isomers. Two of these three isomers have a symmetrical aromatic ring. The <sup>13</sup>C spectrum of **8** reveals that six aromatic carbons are magnetically nonequivalent. From the <sup>13</sup>C-NMR spectrum, it is clear that **8** has an unsymmetrical aromatic ring. Product **8** can be assigned as above.

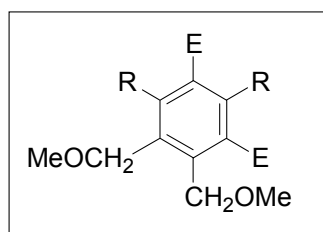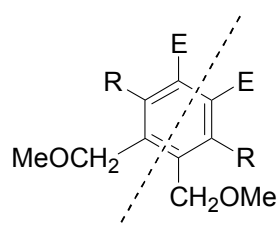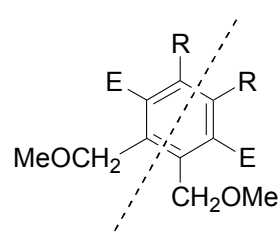

R=*n*-Pentyl E=CO<sub>2</sub>Me

### Assignment of **9**

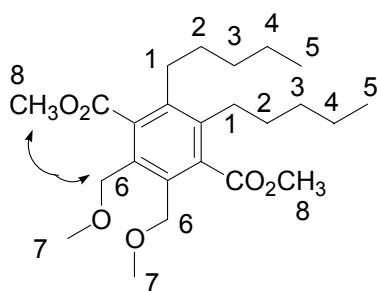

The 2D NOESY spectrum reveals a cross-peak of methyl proton H-8 with methylene

proton H-6. This suggests a short distance between H-6 and H-8.

**Dimethyl 3,4,5,6-tetrakis(methoxymethyl)-1,2-benzenedicarboxylate (11k):**

$^1\text{H}$  NMR (400 MHz,  $\text{CDCl}_3$ )  $\delta$  3.27 (s, 3H x 2), 3.38 (s, 3H x 2), 3.84 (s, 3H x 2), 4.59 (s, 2H x 2), 4.62 (s, 2H x 2);  $^{13}\text{C}$  NMR (100 MHz,  $\text{CDCl}_3$ )  $\delta$  52.2 (2C) ( $\text{OCH}_3$ ), 57.9 (2C) ( $\text{OCH}_3$ ), 58.1 (2C) ( $\text{OCH}_3$ ), 67.1 (2C) ( $\text{CH}_2\text{O}$ ), 68.1 (2C) ( $\text{CH}_2\text{O}$ ), 133.1 (2C) (arom), 136.1 (2C) (arom), 138.6 (2C) (arom), 168.2 (2C) ( $\text{C}=\text{O}$ ). Anal. Calcd for  $\text{C}_{18}\text{H}_{26}\text{O}_8$ : C, 58.37; H, 7.08; O, 34.56. Found: C, 58.16; H, 7.01. This compound was analyzed by GLC.  $t_R$  = 19.54 min (OV-17; Holding at  $140^\circ\text{C}$  for 3 min, then elevating temperature  $10^\circ\text{C}/\text{min}$  to  $280^\circ\text{C}$ ).

**Dimethyl 3,4,5,6-tetraethyl-1,2-benzenedicarboxylate (11m):**  $^1\text{H}$  NMR (400 MHz,  $\text{CDCl}_3$ )  $\delta$  1.15 (t,  $J = 7.5$  Hz, 3H x 2), 1.19 (t,  $J = 7.5$  Hz, 3H x 2), 2.69 (q,  $J = 7.5$  Hz, 2H x 2), 2.71 (q,  $J = 7.5$  Hz, 2H x 2), 3.84 (s, 3H x 2);  $^{13}\text{C}$  NMR (100 MHz,  $\text{CDCl}_3$ )  $\delta$  15.4 (2C) ( $\text{CH}_3$ ), 15.9 (2C) ( $\text{CH}_3$ ), 22.0 (2C) ( $\text{CH}_2$ ), 23.4 (2C) ( $\text{CH}_2$ ), 52.0 (2C) ( $\text{OCH}_3$ ), 130.4 (2C) (arom), 138.0 (2C) (arom), 143.1 (2C) (arom), 169.6 (2C) ( $\text{C}=\text{O}$ ). This compound was reported in Reference 3(a) in the text. This compound was analyzed by GLC.  $t_R$  = 15.52 min (OV-17; Holding at  $140^\circ\text{C}$  for 3 min, then elevating temperature  $10^\circ\text{C}/\text{min}$  to  $280^\circ\text{C}$ ).

**Dimethyl 3,4-di(*n*-butyl)-1,2-benzenedicarboxylate (12a):**  $^1\text{H}$  NMR (400 MHz,  $\text{CDCl}_3$ )  $\delta$  0.95 (t,  $J = 7.3$  Hz, 6H), 1.40 (sixtet,  $J = 7.3$  Hz, 4H), 1.57 (quintet,  $J = 7.3$  Hz, 4H), 2.63-2.67 (m, 4H), 3.88 (s, 6H), 7.49 (s, 2H);  $^{13}\text{C}$  NMR (100 MHz,  $\text{CDCl}_3$ )  $\delta$  13.8 (2C) ( $\text{CH}_3$ ), 22.6 (2C) ( $\text{CH}_2$ ), 32.2 (2C) ( $\text{CH}_2$ ), 32.9 (2C) ( $\text{CH}_2$ ), 52.4 (2C) ( $\text{OCH}_3$ ), 129.3 (2C) (arom), 129.6 (2C) (arom), 144.2 (2C) (arom), 168.3 (2C) ( $\text{C}=\text{O}$ ). Anal. Calcd for  $\text{C}_{18}\text{H}_{26}\text{O}_4$ : C, 70.56; H, 8.55; O, 20.89. Found: C, 70.68; H, 8.42. This compound was analyzed by GLC.  $t_R$  = 16.23 min (OV-17; Holding at  $140^\circ\text{C}$  for 3 min, then elevating temperature  $10^\circ\text{C}/\text{min}$  to  $280^\circ\text{C}$ ).

**Assignment of 12a**

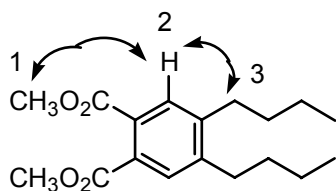

The 2D NOESY spectrum reveals cross-peaks of proton H-2 with methyl proton H-1 and methylene proton H-3. This suggests a short distance between H-1, H-2 and H-3.

**Dimethyl 3,5-di(*n*-butyl)-1,2-benzenedicarboxylate (12b):**  $^1\text{H}$  NMR (400 MHz,  $\text{CDCl}_3$ )  $\delta$  0.92 (t,  $J = 7.3$  Hz, 3H), 0.93 (t,  $J = 7.3$  Hz, 3H), 1.31-1.38 (m, 4H), 1.53-1.62 (m, 4H), 2.59 (t,  $J = 7.7$  Hz, 2H), 2.63 (t,  $J = 7.7$  Hz, 2H), 3.87 (s, 3H), 3.91 (s, 3H), 7.22 (d,  $J = 1.6$  Hz), 7.63 (d,  $J = 1.6$  Hz);  $^{13}\text{C}$  NMR (100 MHz,  $\text{CDCl}_3$ )  $\delta$  13.8 (2C) ( $\text{CH}_3$ ), 22.2 ( $\text{CH}_2$ ), 22.5 ( $\text{CH}_2$ ), 33.0 ( $\text{CH}_2$ ), 33.3 ( $\text{CH}_2$ ), 33.5 ( $\text{CH}_2$ ), 35.2 ( $\text{CH}_2$ ), 52.29 ( $\text{OCH}_3$ ), 52.33 ( $\text{OCH}_3$ ), 127.5 (arom), 128.0 (arom), 132.3 (arom), 133.7 (arom), 140.5 (arom), 144.1 (arom), 166.6 ( $\text{C}=\text{O}$ ), 170.0 ( $\text{C}=\text{O}$ ). Anal. Calcd for  $\text{C}_{18}\text{H}_{26}\text{O}_4$ : C, 70.56; H, 8.55; O, 20.89. Found: C, 70.60; H, 8.55. This compound was analyzed by GLC.  $t_R = 15.48$  min (OV-17; Holding at  $140^\circ\text{C}$  for 3 min, then elevating temperature  $10^\circ\text{C}/\text{min}$  to  $280^\circ\text{C}$ ).

#### Assignment of 12b

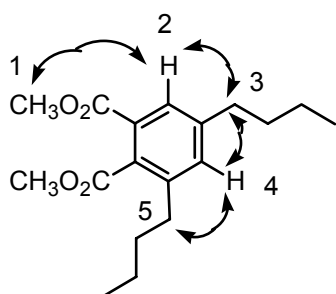

The 2D NOESY spectrum reveals cross-peaks of proton H-2 with methyl proton H-1 and methylene proton H-3. This suggests a short distance between H-1, H-2 and H-3. Cross-peaks of proton H-4 with methylene proton H-3 and methylene proton H-5 were observed. This suggests a short distance between H-3, H-4 and H-5. The reaction of one molecule of DMAD with two molecule of 1-hexyne can give three isomers. Two

of these three isomers have a symmetrical aromatic ring. The  $^{13}\text{C}$  spectrum of **12b** reveals that six aromatic carbons are magnetically nonequivalent. From the  $^{13}\text{C}$ -NMR spectrum, it is clear that **12b** has an unsymmetrical aromatic ring. Product **12b** can be assigned as above.

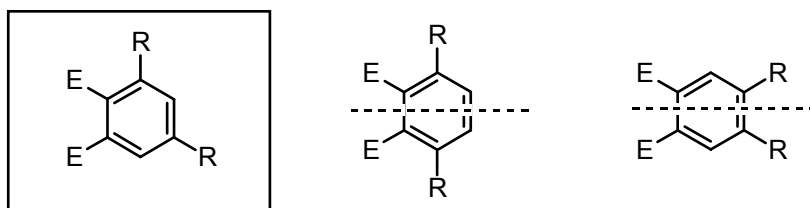

R=*n*-Butyl E=CO<sub>2</sub>Me

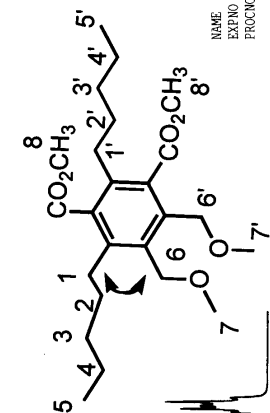

NOESY Product 8

H-1 H-1'

H-7 H-7'

H-8  
H-8'

H-6' H-6

Product 8

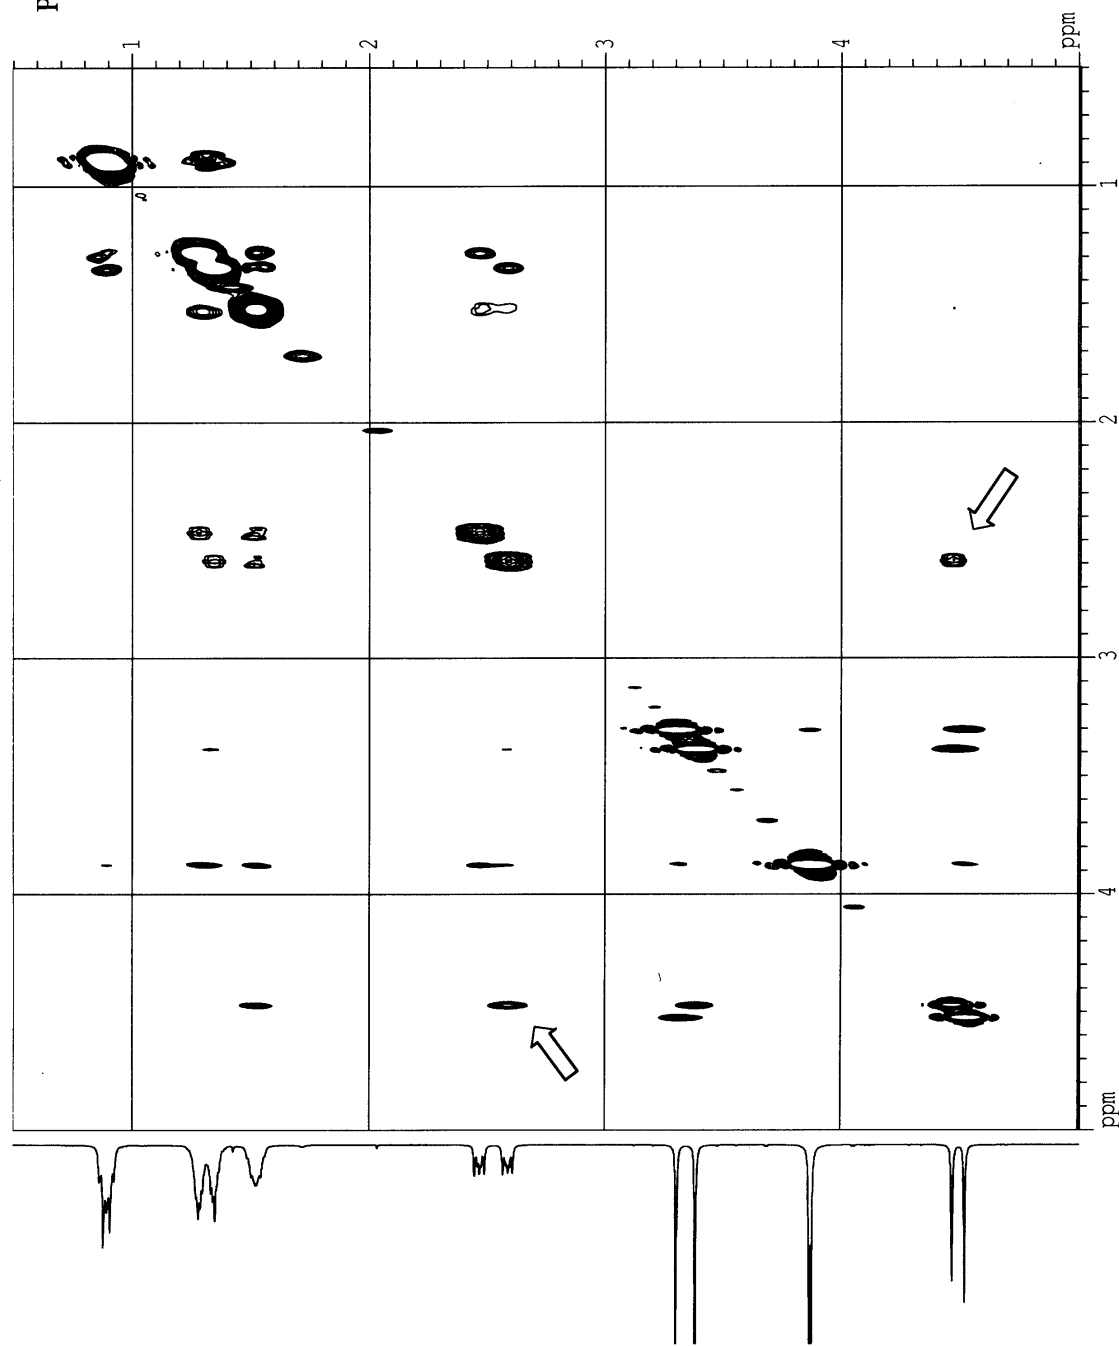

Current Data Parameters

NAME tomaki  
EXPNO 76  
PROCNO 1

F2 - Acquisition Parameters

Date\_ 20020722  
Time 21.13  
INSTRUM dpx400  
PROBHD 5 mm QNP 1H/13  
PULPROG noesytp  
TD 2048  
SOLVENT CDCl3  
NS 80  
DS 8  
SWH 5208.333 Hz  
FIDRES 2.543132 Hz  
AQ 0.1966380 sec  
RG 32  
DM 96.000 usec  
DE 6.00 usec  
TE 300.0 K  
D0 0.0000300 sec  
D1 1.00000000 sec  
D8 1.00000000 sec  
TMO 0.00009600 sec

===== CHANNEL f1 =====

NUC1 1H  
P1 10.50 usec  
PL1 -3.00 dB  
SFO1 400.1322007 MHz

F1 - Acquisition Parameters

ND0 2  
TD 256  
SFO1 400.1322 MHz  
FIDRES 20.345053 Hz  
SW 13.017 ppm

F2 - Processing parameters

SI 2048  
SF 400.1300035 MHz  
WDW QSINE  
SSB 2  
LB 0.00 Hz  
GB 0  
PC 1.00

F1 - Processing parameters

SI 1024  
WDW TPPI  
SF 400.1300035 MHz  
WDW QSINE  
SSB 2  
LB 0.00 Hz  
GB 0

2D NMR plot parameters

CX2 15.00 cm  
CX1 15.00 cm  
F2PLO 5.002 ppm  
F2LO 2001.43 Hz  
F2PHI 0.496 ppm  
F2H1 198.35 Hz  
F1PLO 5.008 ppm  
F1LO 2003.97 Hz  
F1PHI 0.496 ppm  
F1H1 198.35 Hz  
F2PPMCM 0.30042 ppm/cm  
F2HZCM 120.20555 Hz/cm  
F1PPMCM 0.30084 ppm/cm  
F1HZCM 120.37489 Hz/cm

# NOESY Product 9

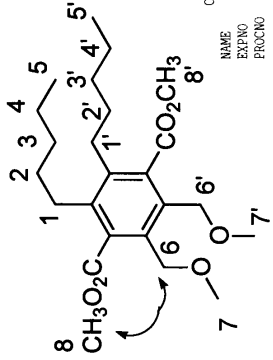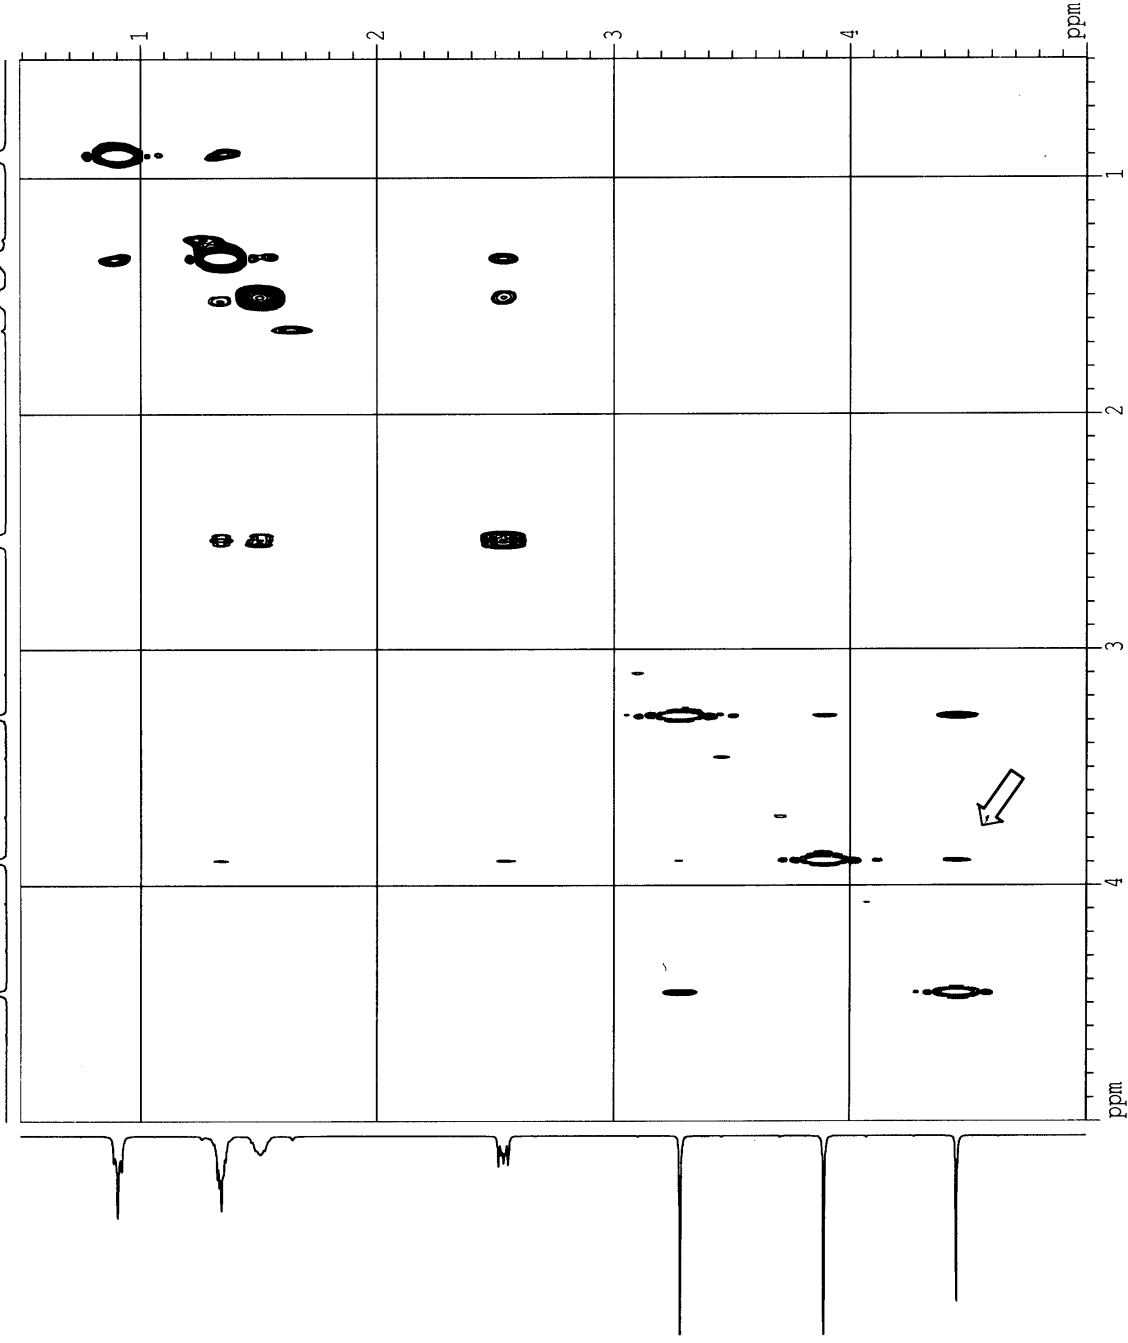

## Product 9

### Current Data Parameters

NAME tomaki  
EXPNO 78  
PROCNO 1

### F2 - Acquisition Parameters

Date\_ 20020724  
Time 20:54  
INSTRUM dpx400  
PROBHD 5 mm QNP 1H/13  
PULPROG noesytp  
TD 2048  
SOLVENT CDCl3  
NS 80  
DS 8  
SWH 5208.333 Hz  
FIDRES 2.543132 Hz  
AQ 0.1566580 sec  
RG 71.8  
DM 96.000 usec  
DE 300.0 K  
TE 300.0 K  
D1 0.00000300 sec  
D11 1.00000000 sec  
D8 1.00000000 sec  
D9 1.00000000 sec  
LW 0.00009600 sec

### CHANNEL f1

NUC1 1H  
P1 10.50 usec  
PL1 -3.00 dB  
SFO1 400.1322007 MHz

### F1 - Acquisition Parameters

ND0 2  
TD 256  
SFO1 400.1322 MHz  
FIDRES 20.345053 Hz  
SW 13.017 ppm

### F2 - Processing parameters

SI 2048  
SF 400.130065 MHz  
WDW QSI  
SSB 2  
LB 0.00 Hz  
GB 0  
PC 1.00

### F1 - Processing parameters

SI 1024  
MC2 TPPI  
SF 400.130065 MHz  
WDW QSI  
SSB 2  
LB 0.00 Hz  
GB 0

### 2D NMR plot parameters

CX2 15.00 cm  
CX1 15.00 cm  
F2PLO 5.001 ppm  
F2LO 2000.95 Hz  
F2PHI 0.495 ppm  
F2H 197.87 Hz  
F2PLO 5.001 ppm  
F2LO 2000.95 Hz  
F2PHI 0.488 ppm  
F2H 195.33 Hz  
F2PPMCM 0.30042 ppm/cm  
F2HZCM 120.20535 Hz/cm  
F1PPMCM 0.30084 ppm/cm  
F1HZCM 120.37489 Hz/cm

NOESY

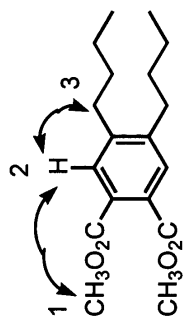

Product 12a

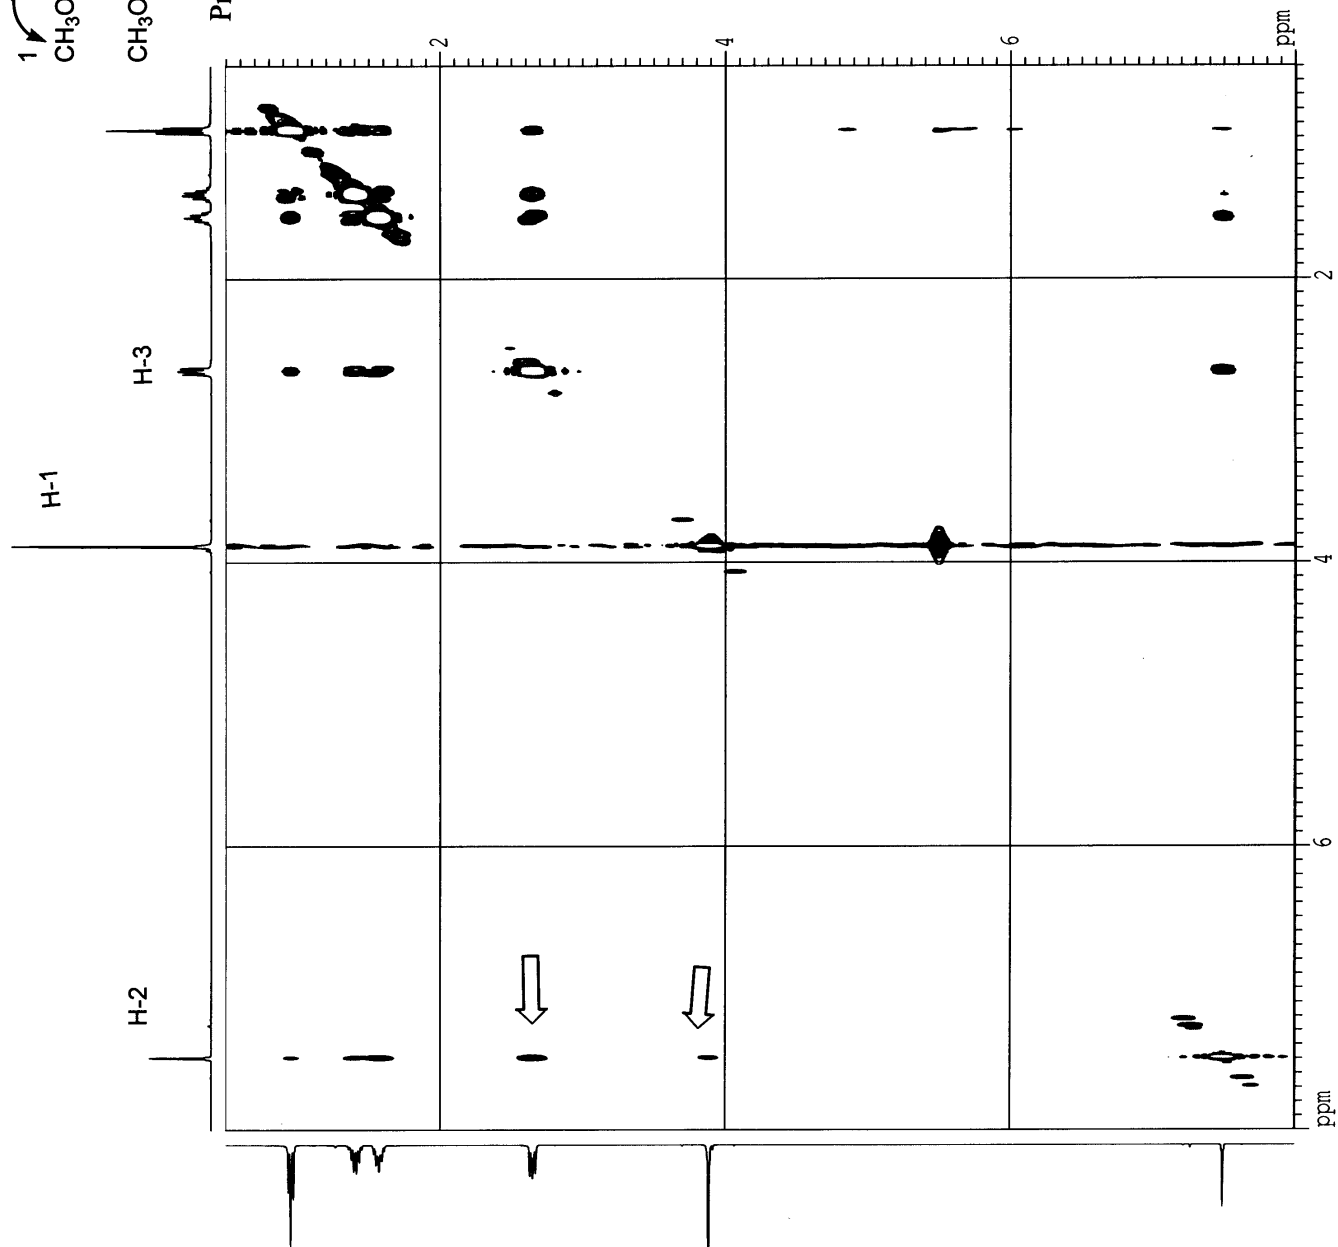



NOESY

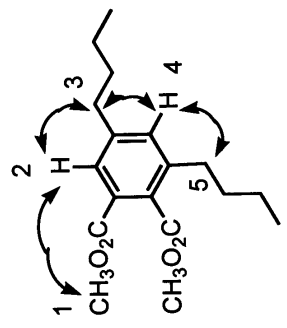

Product 12b

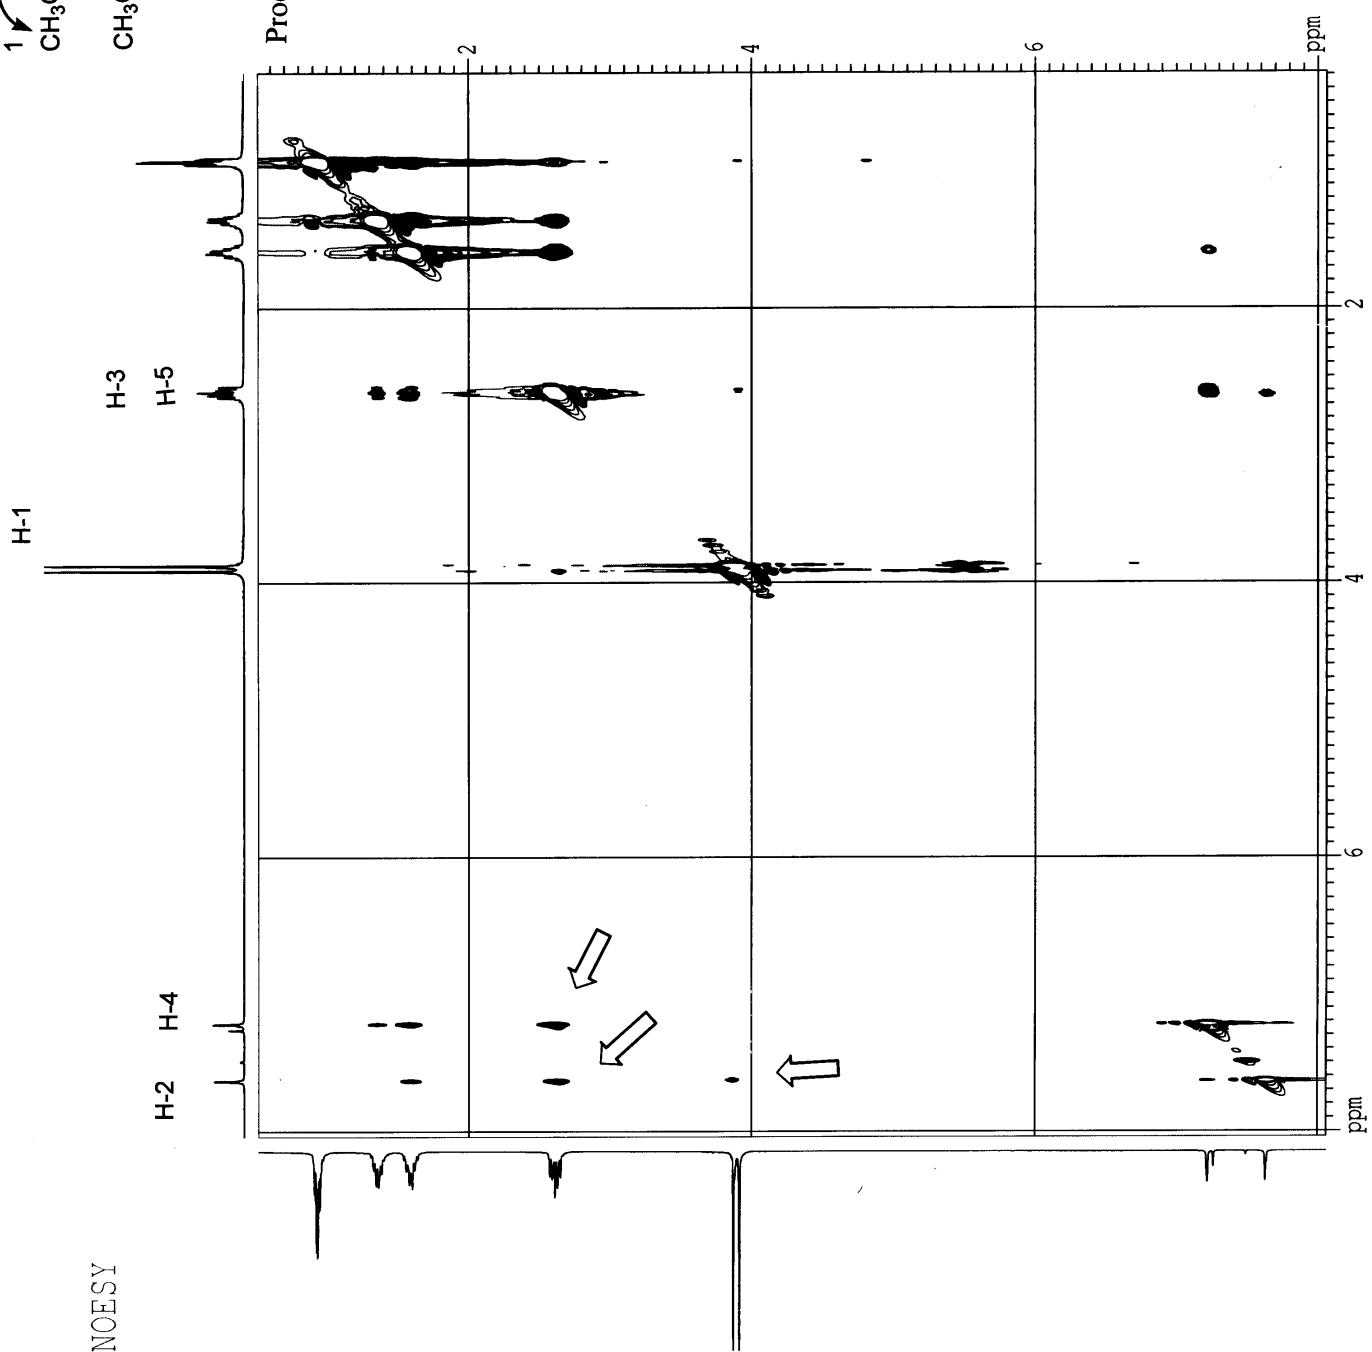

Supplement: Supplementary file 1 [file 5841516]
